# Supplementary material
Source: Springer Nature journal article supplement (https://www.springermedizin.de/resource/supplementary/12992_2012_217_MOESM4_ESM.pdf/9616696)
Supplement: MOESM4 [file 9616696]

Potentially relevant documents identified and screened for retrieval  
(*n*=203)

Documents excluded, with reasons  
(*n*=63)

Documents included in stakeholders' mapping  
(*n*=140)

Documents excluded, with reasons (no stance)  
(*n*=52)

Documents included in thematic analysis  
(*n*=88)
